# Supplementary material for: Network-based approach for targeting human kinases commonly associated with amyotrophic lateral sclerosis and cancer
Source: PubMed Central journal article supplement (PMC9802580; doi:10.3389/fnmol.2022.1023286), 2022-12-16
Supplement: Image_1.pdf [file Image_1.pdf]

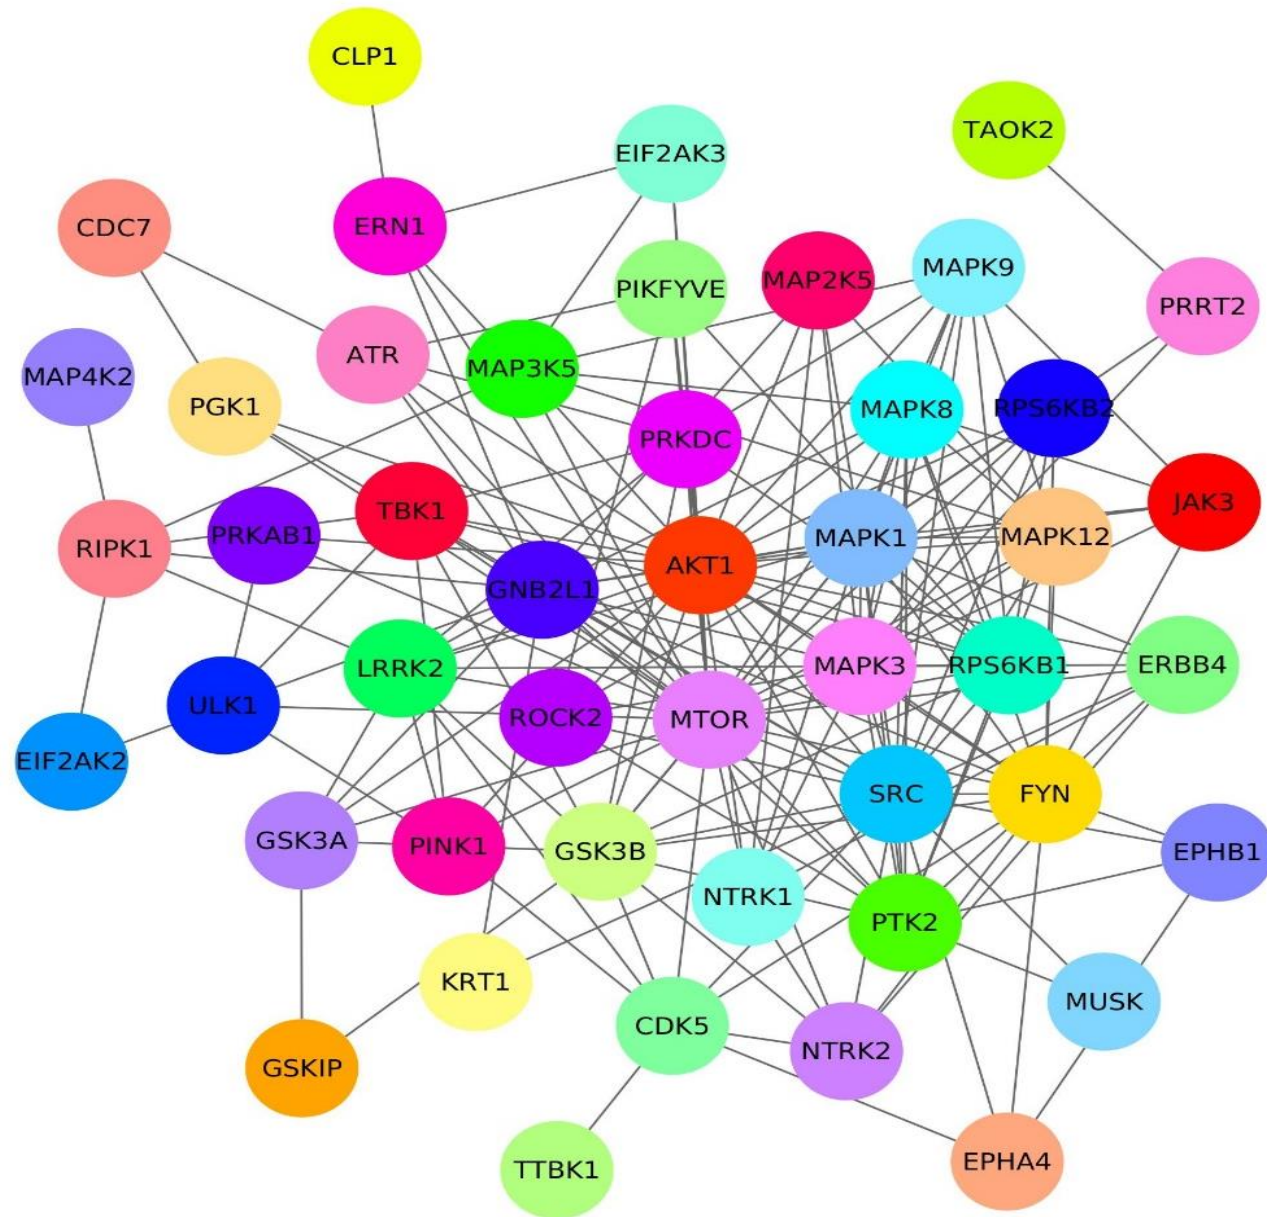

**Supplementary Figure S1.** Protein-Protein Interaction network of the identified ALS-associated kinases
